# Supplementary material for: NTSR1 glycosylation and MMP dependent cleavage generate three distinct forms of the protein
Source: PubMed Central journal article supplement (PMC10033925; doi:10.1038/s41598-023-31790-7), 2023-03-22

Figure 1 : NTSR1 is expressed as 3 protein forms of different molecular weight

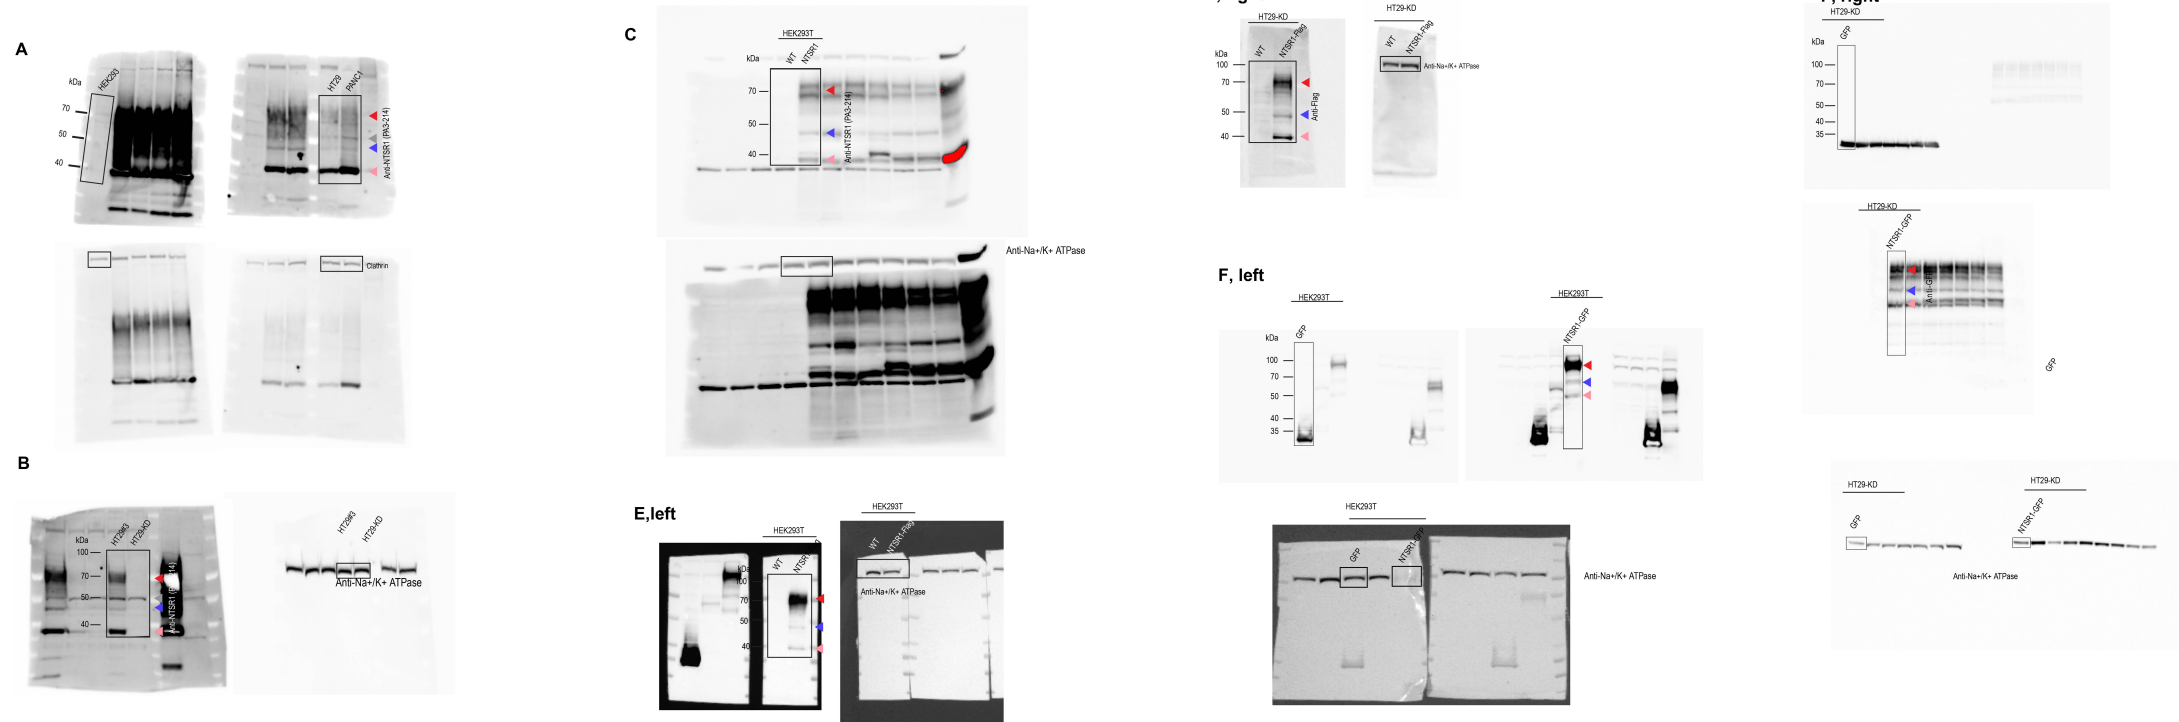

**Figure 2 : Neurotensin regulates the relative abundance and stability of NTSR1 protein forms**

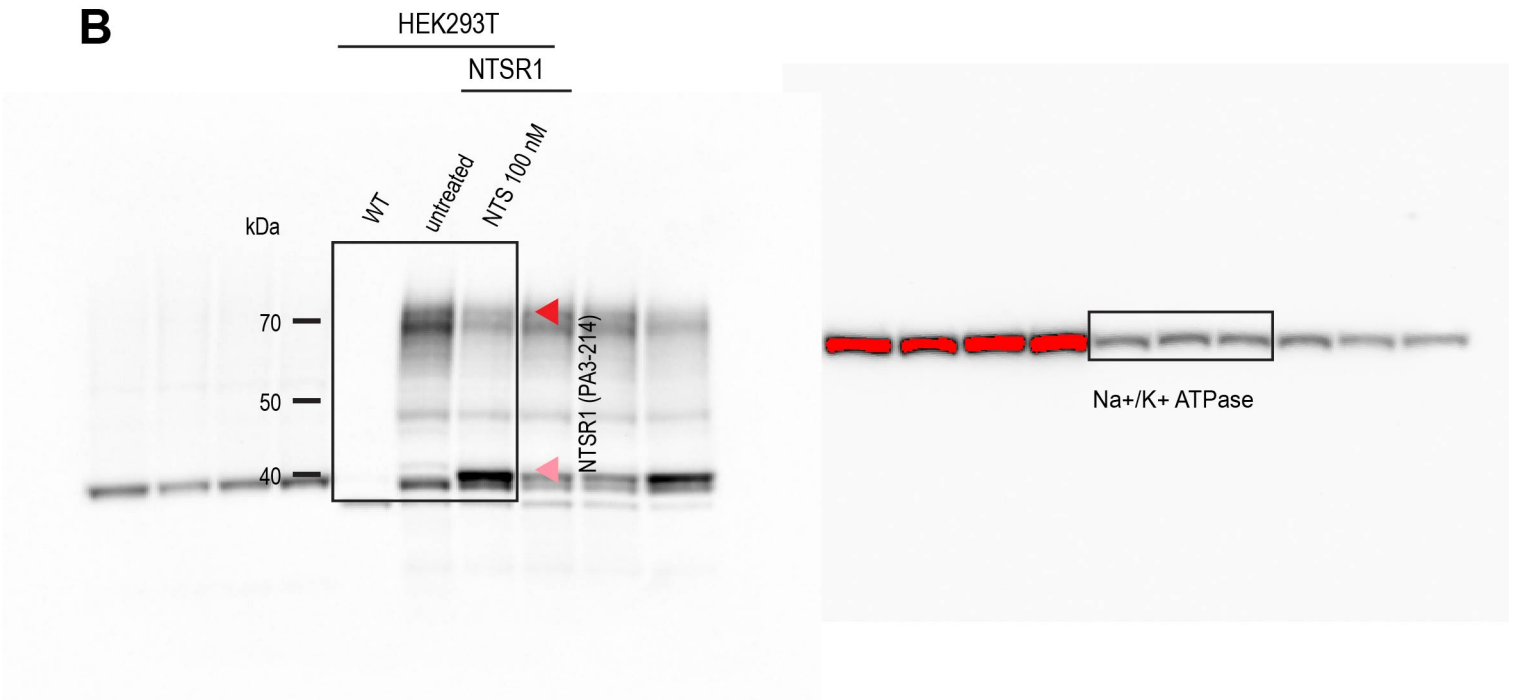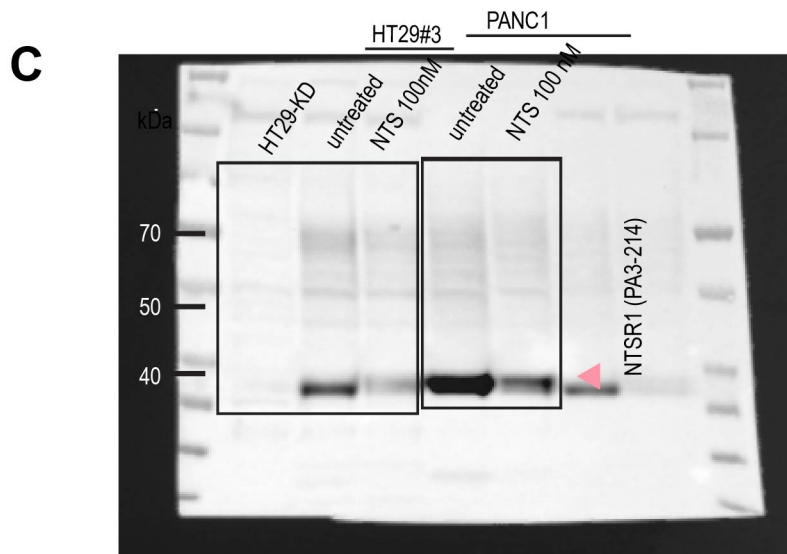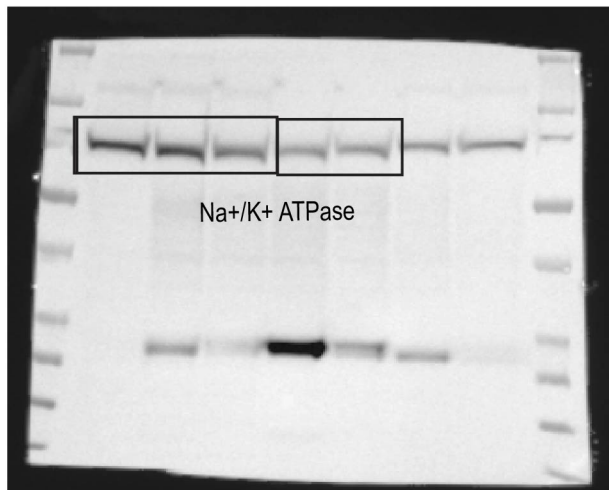

**Figure 3 :Glycosylation of NTSR1 through the secretory pathway generates NTSR1-high form**

**A**

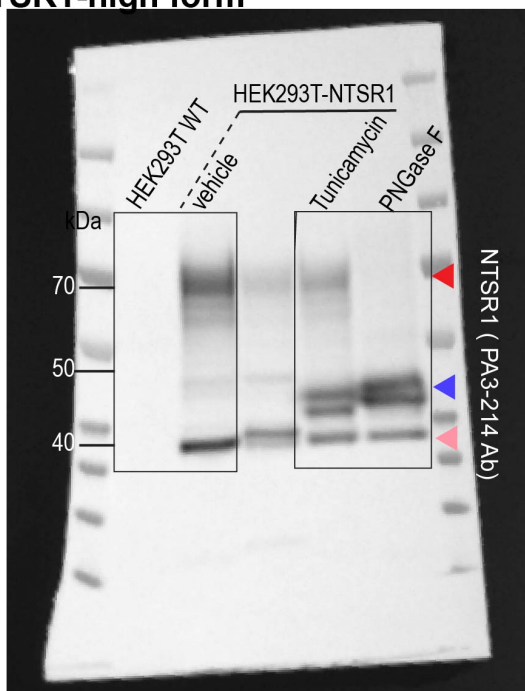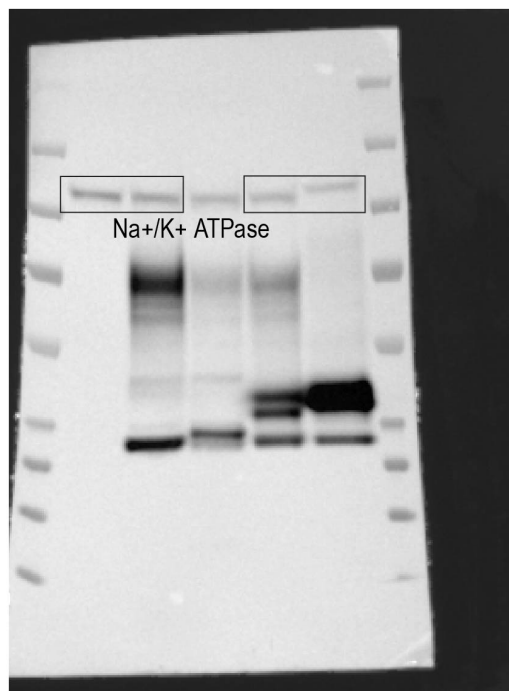

**B**

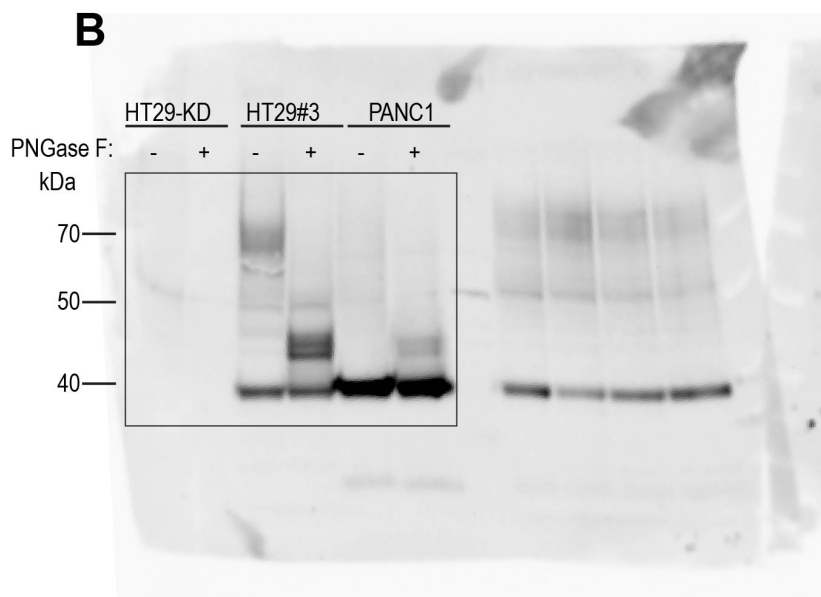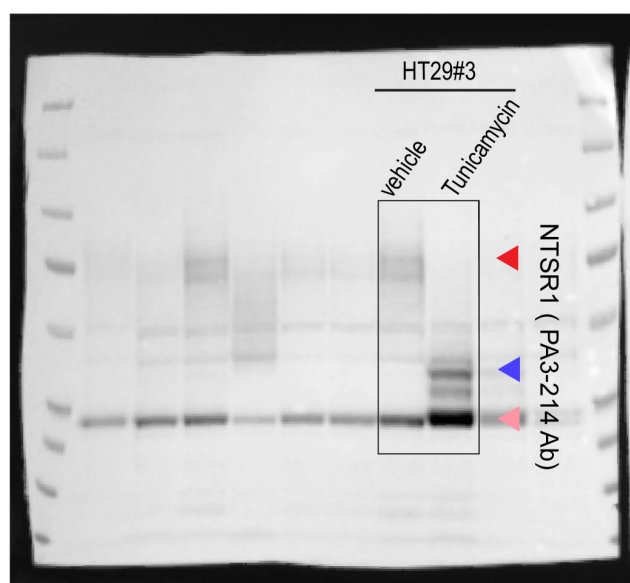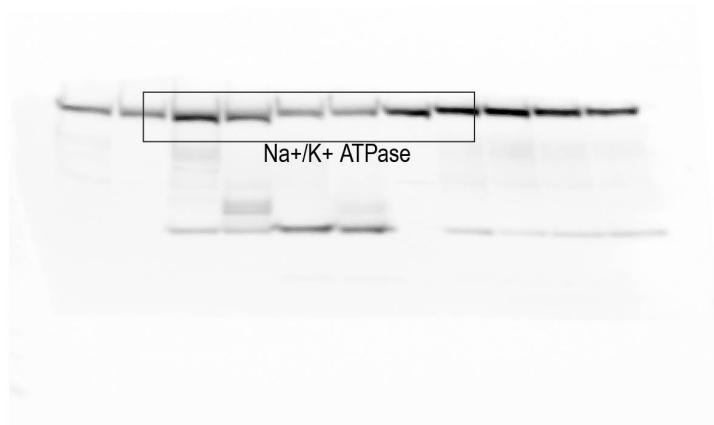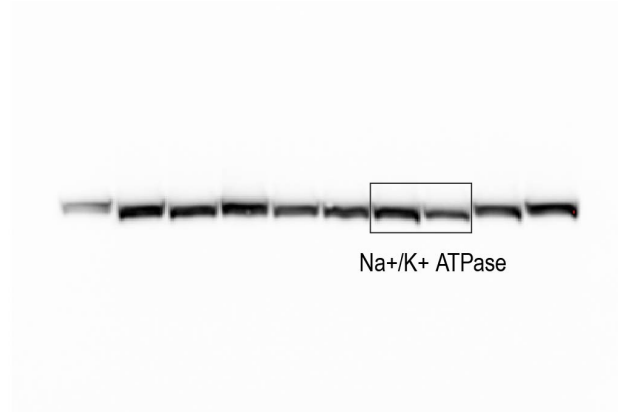

**Figure 4: NTSR1-high form is N-terminally cleaved by matrix metalloproteinase to form the NTSR1-low protein form**

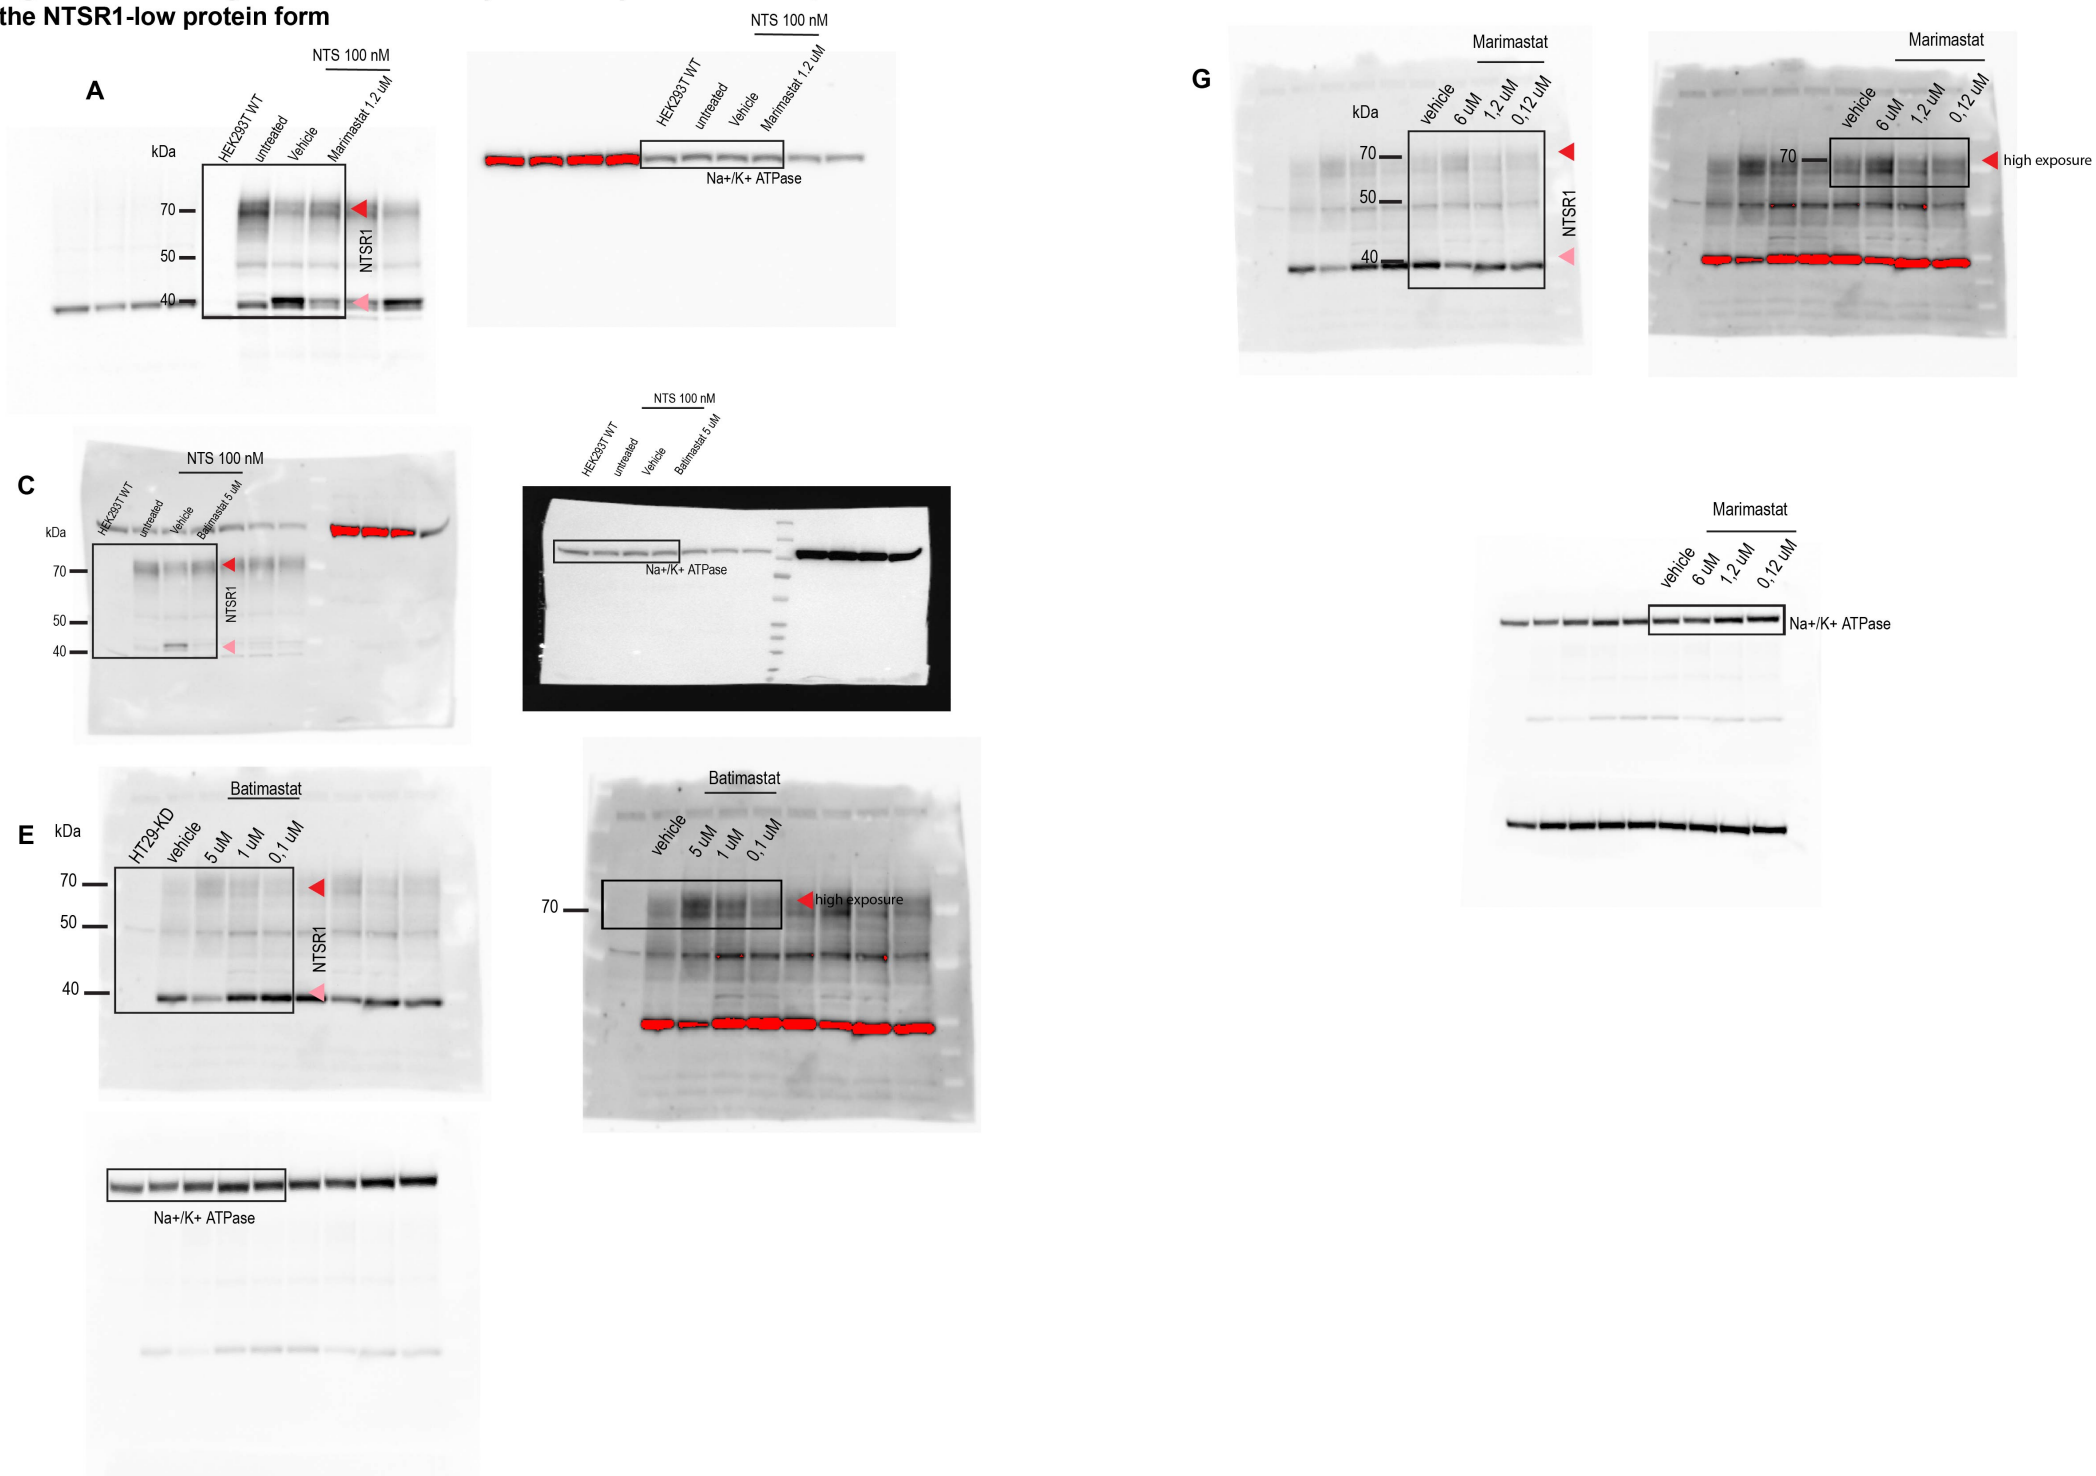

**Figure 5: Neurotensin promotes NTSR1's internalization and the degradation of NTSR1 low form by the proteasome**

**D**

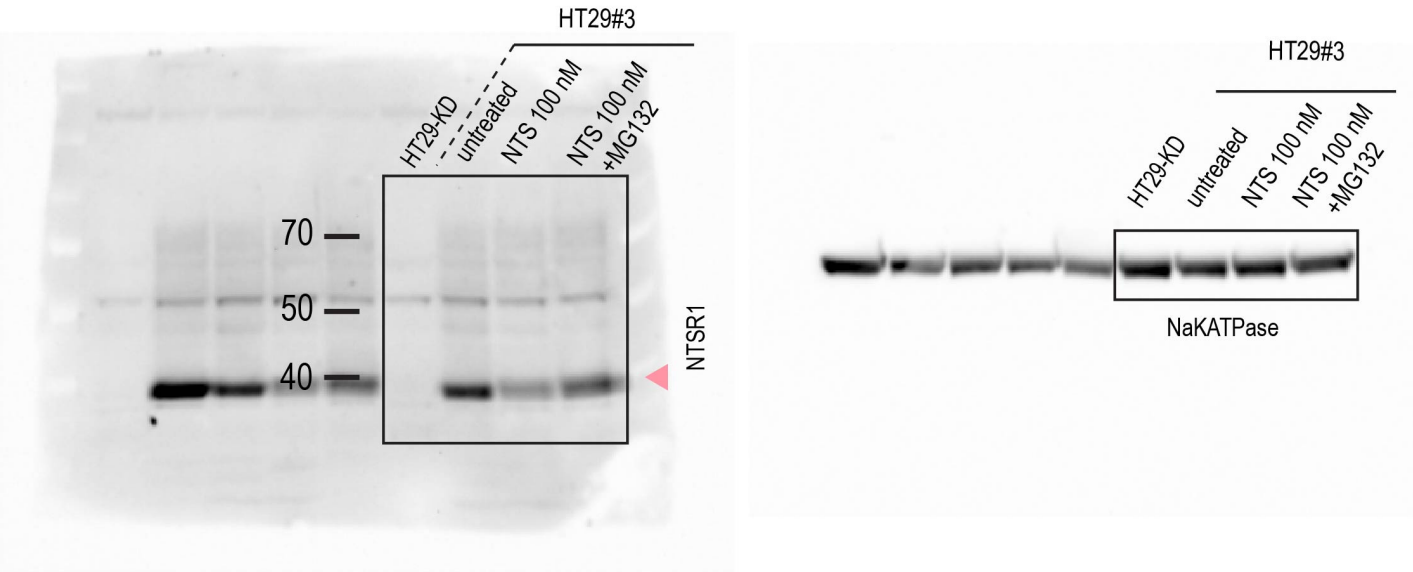

**E**

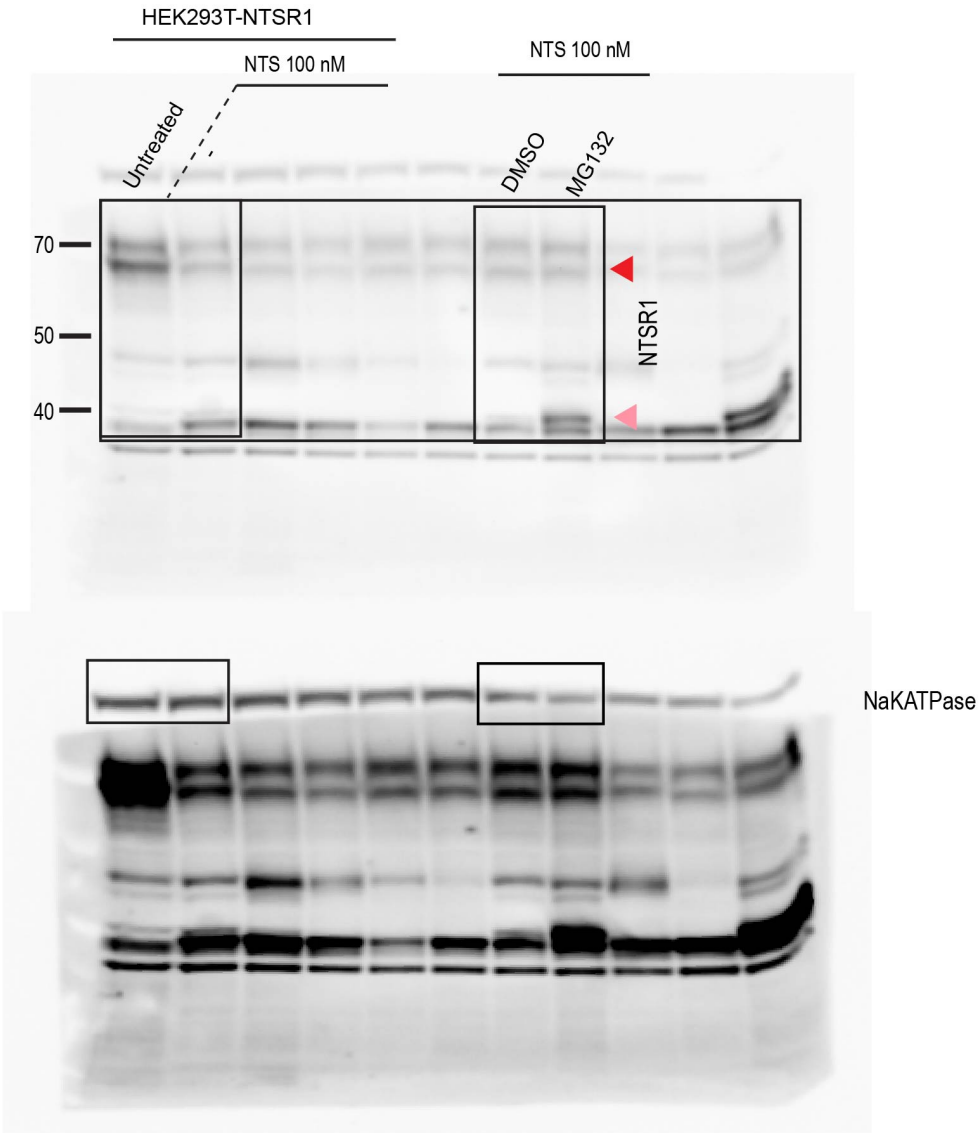

Supplementary figure 1: NTSR1 SDS/PAGE WB optimal conditions

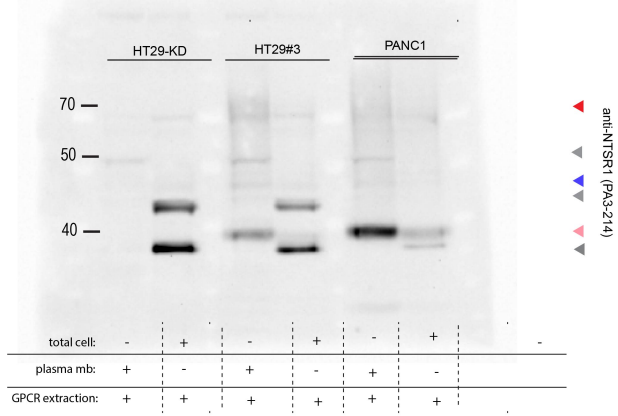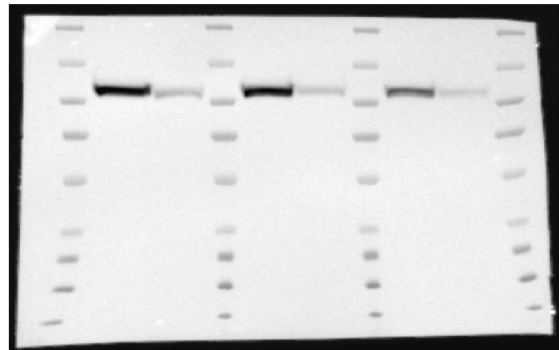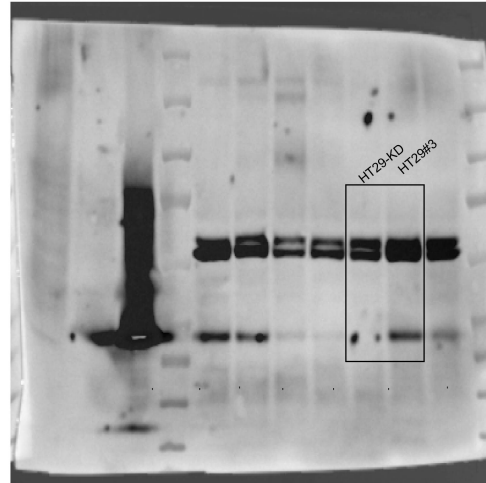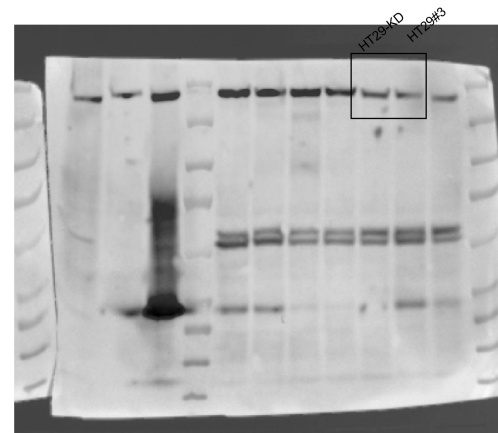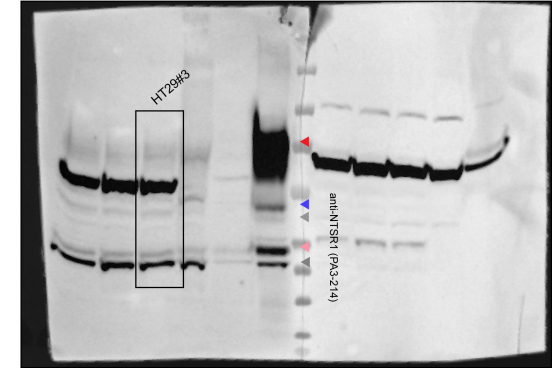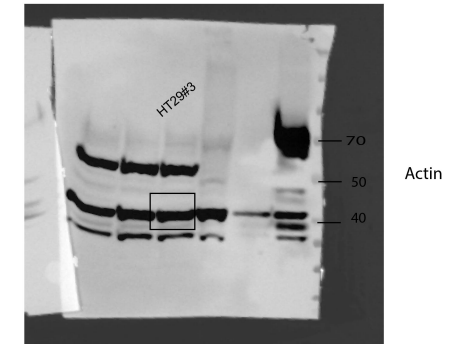

# Supplementary figure 2 : NTSR1 protein depletion by siRNA, shRNA and CRISPR-cas9

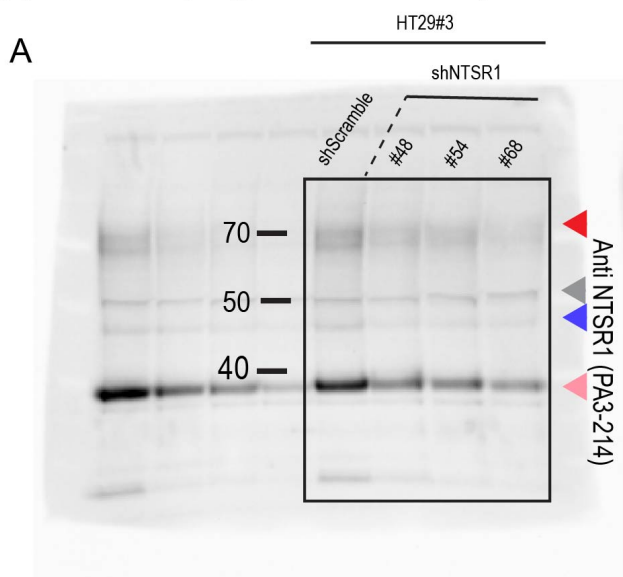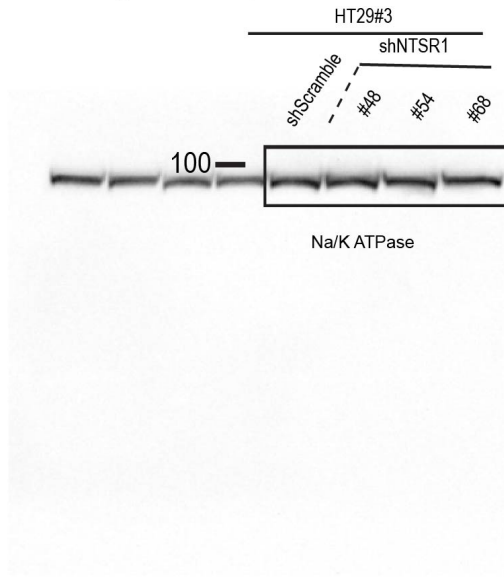

**B**

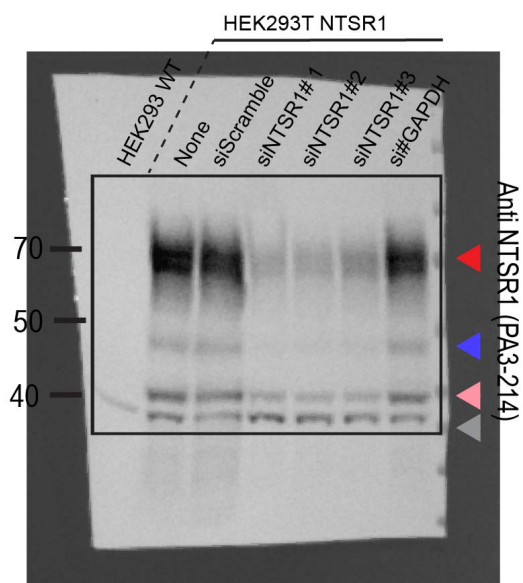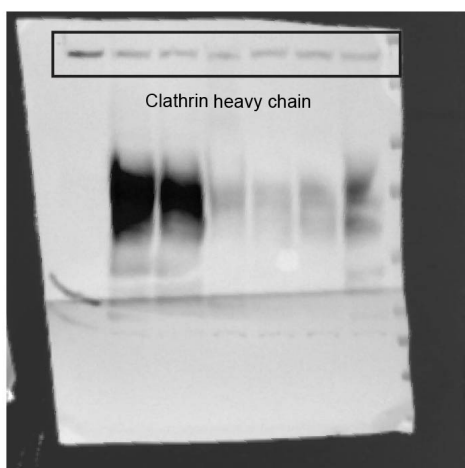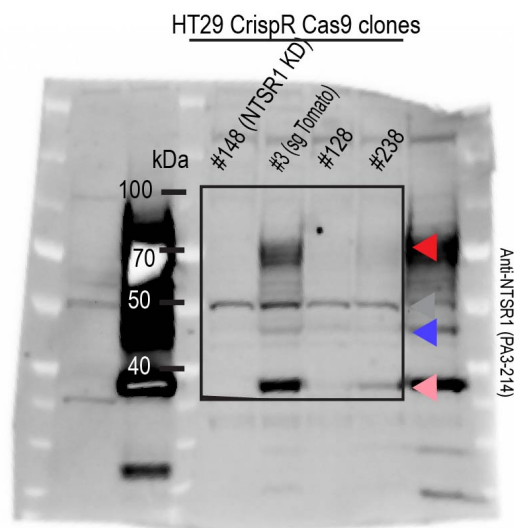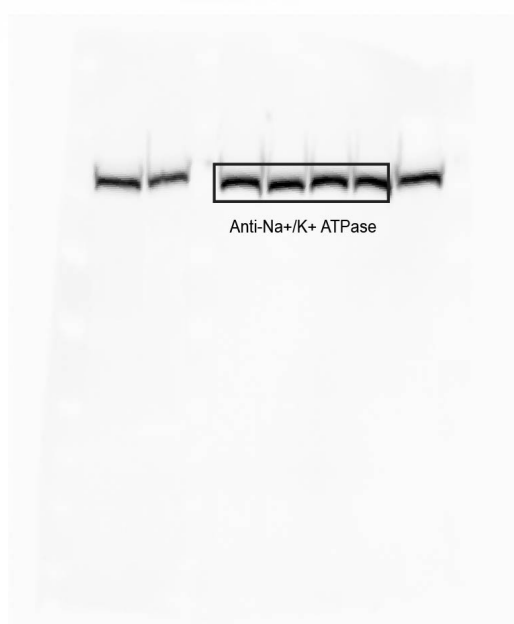

### Supplementary figure 3 : NTSR1 protein construct

HT29-KD

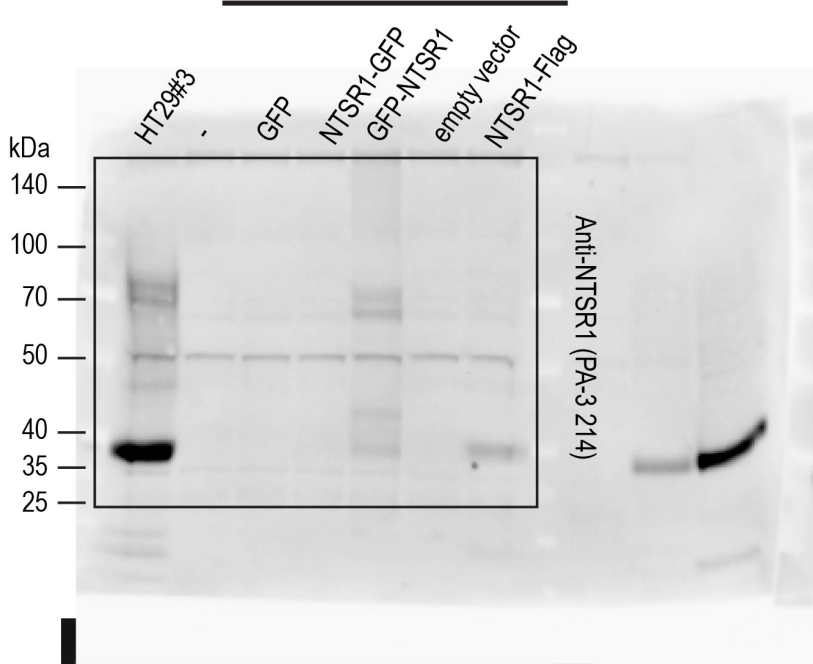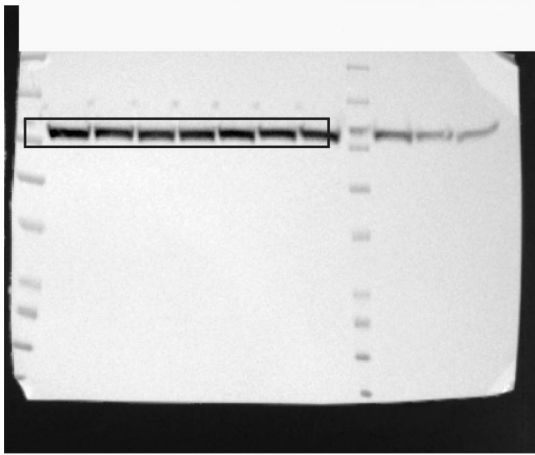

Na/K ATPase

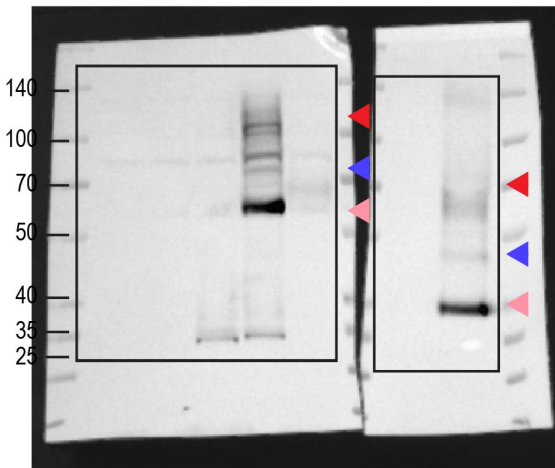

Anti-TAG (GFP or flag)

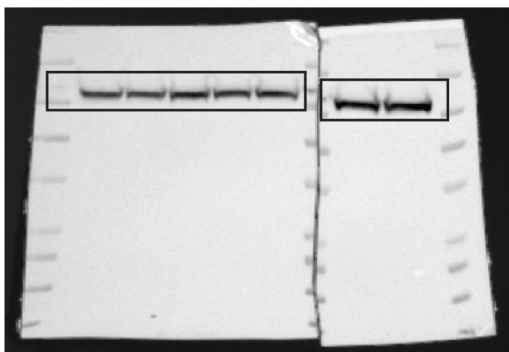

Na/K ATPase



**Supplementary figure 5 : NTSR1-high is not destabilized by denaturing agents**

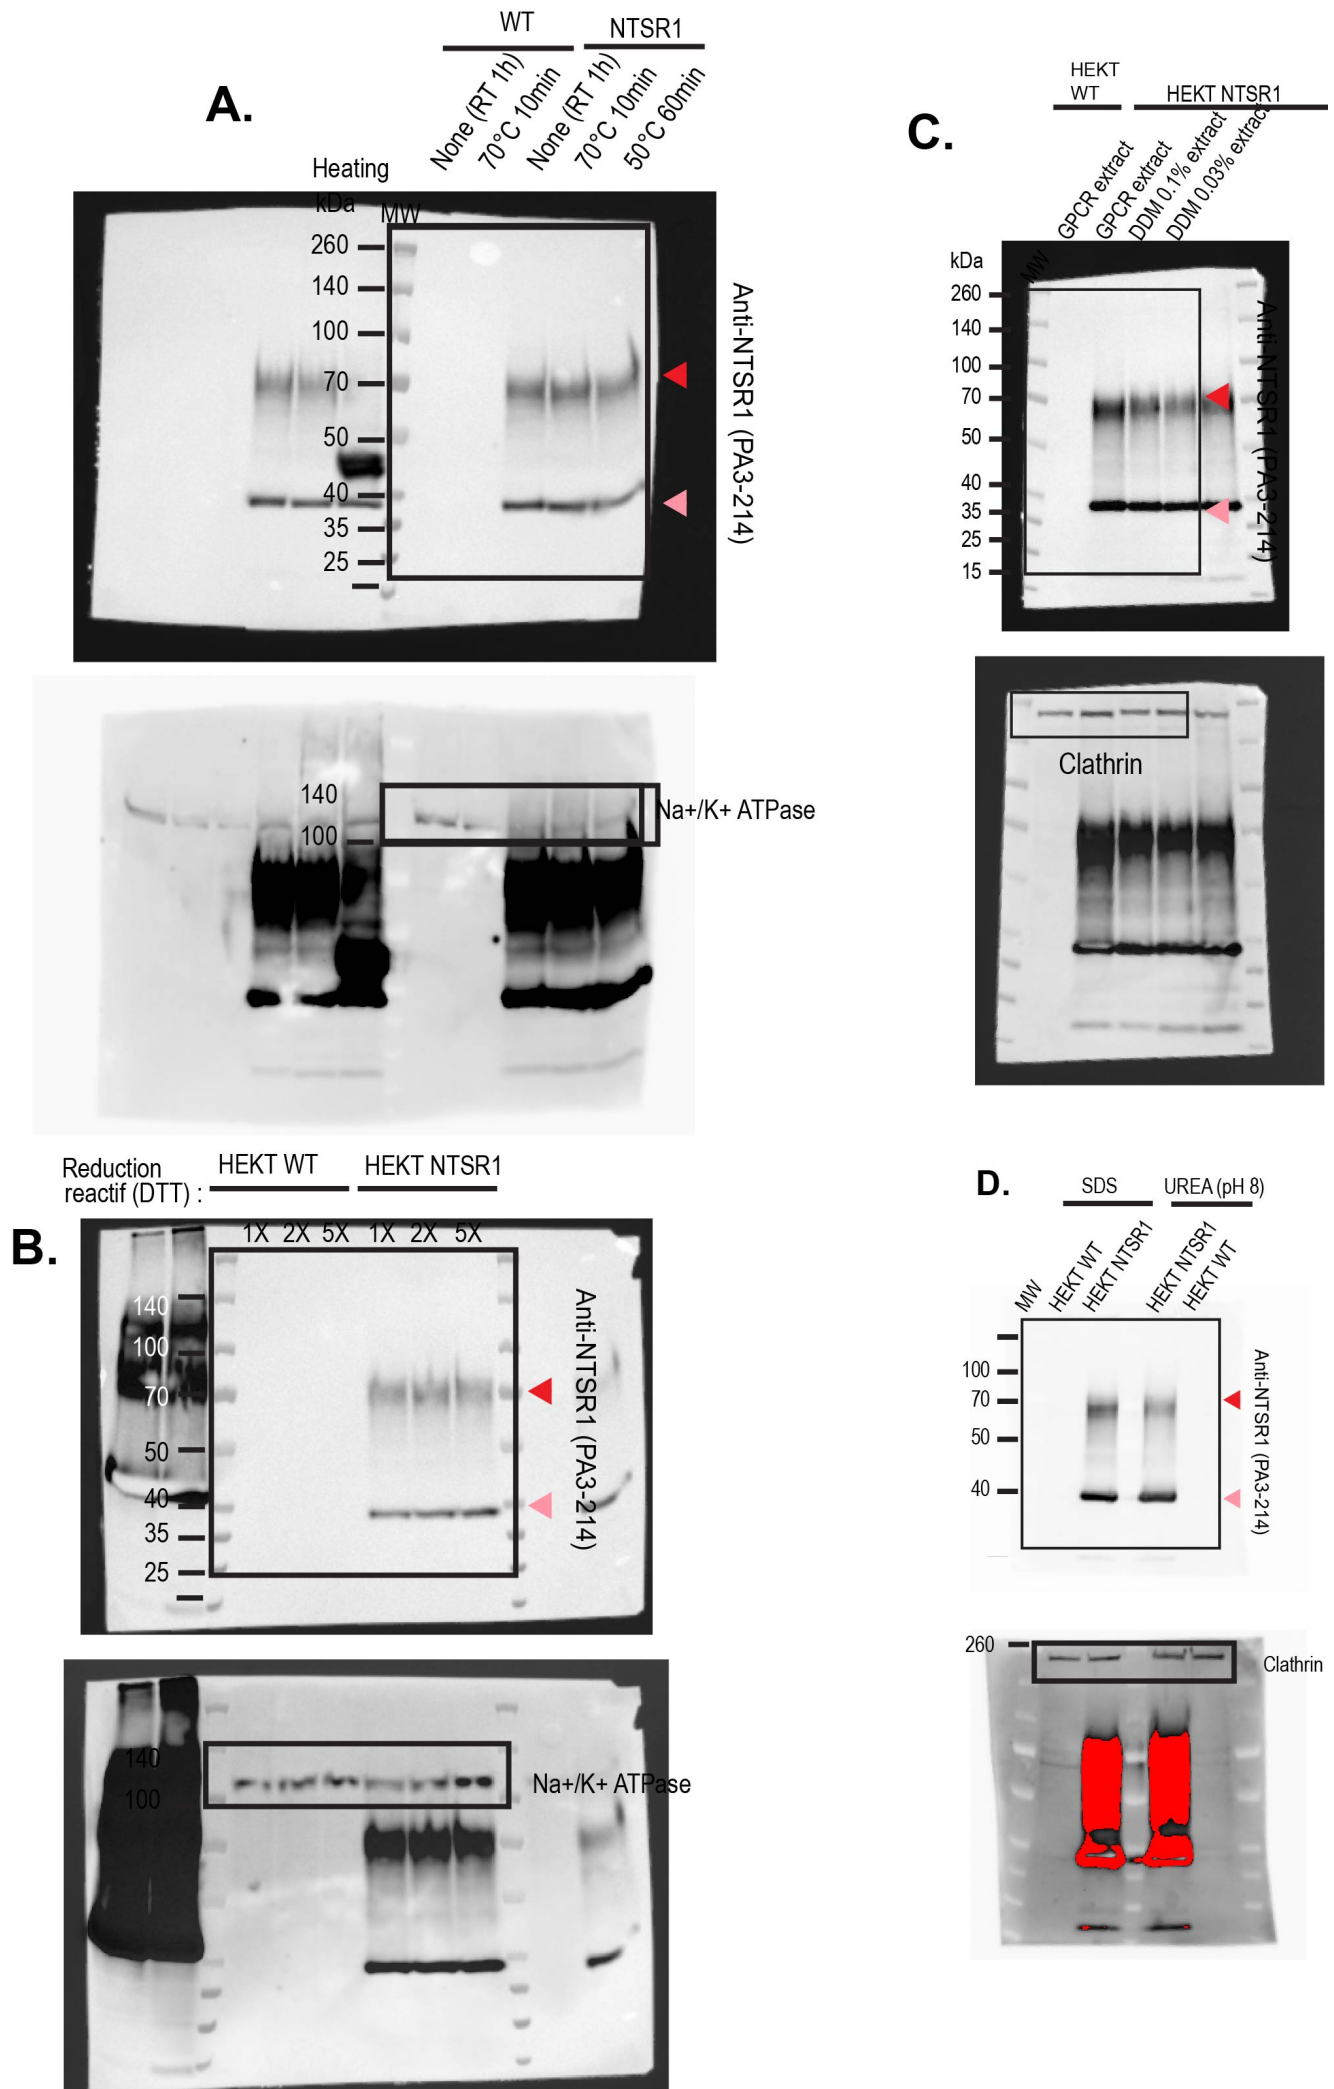

Supplementary figure 6 : NTSR1 is deglycosylated by PNGase F and BADG

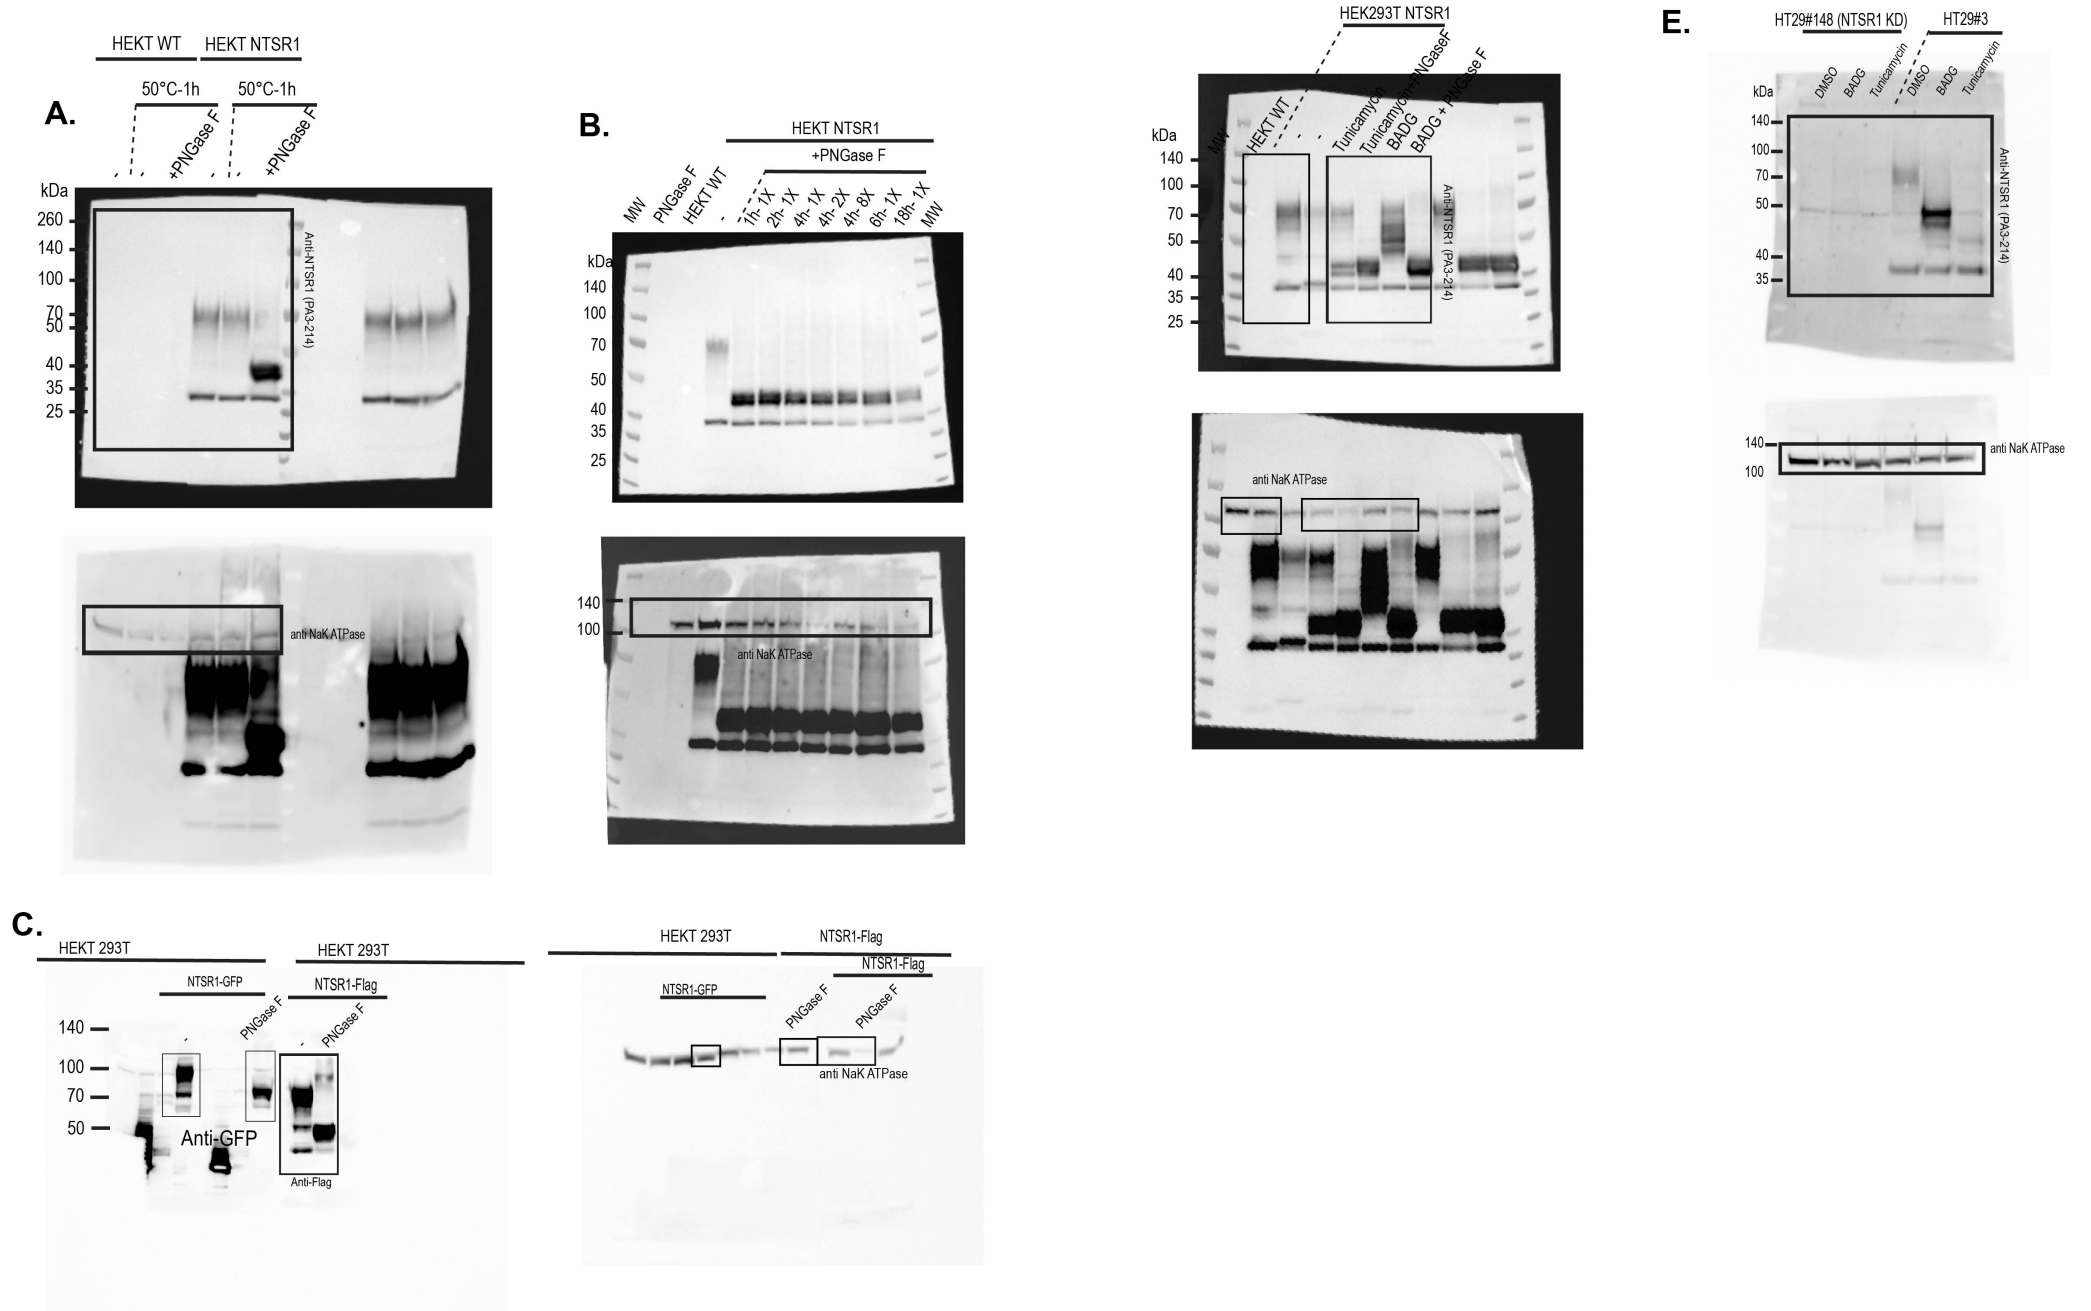

# Supplementary figure 8 : NTSR1 expression in CRC PDX

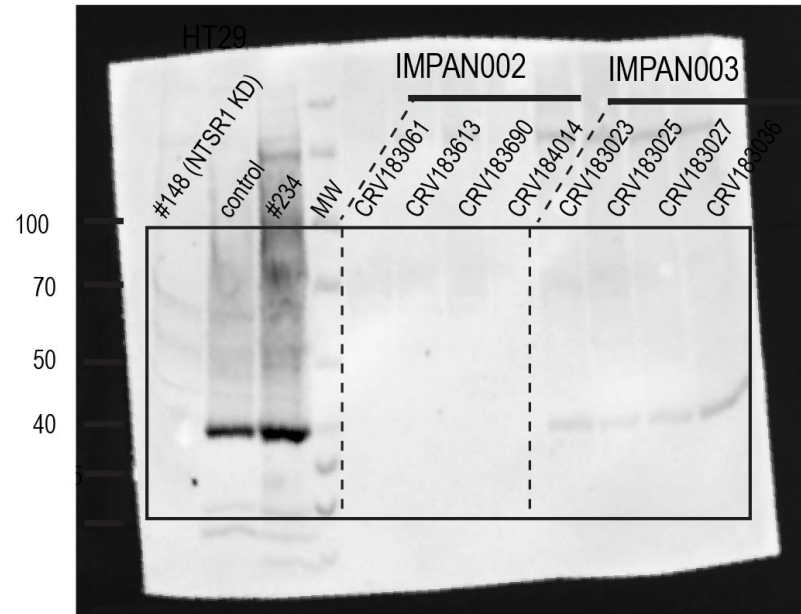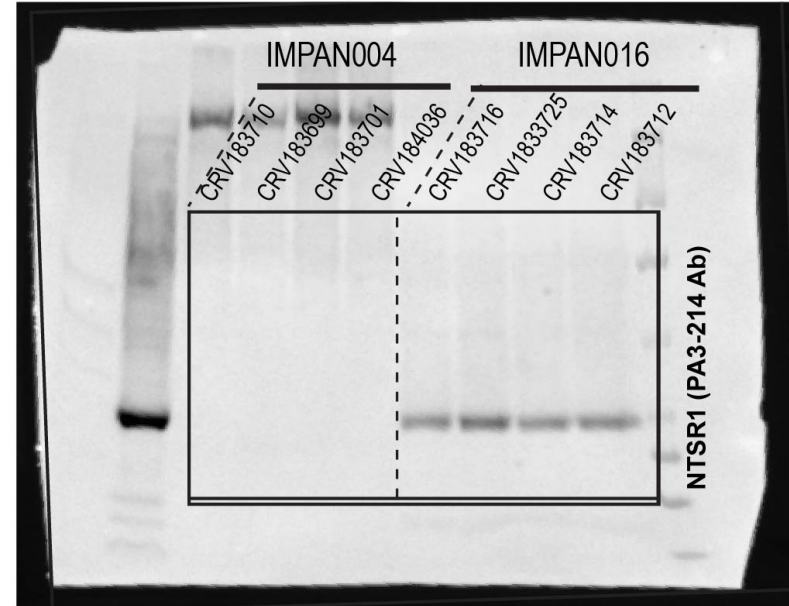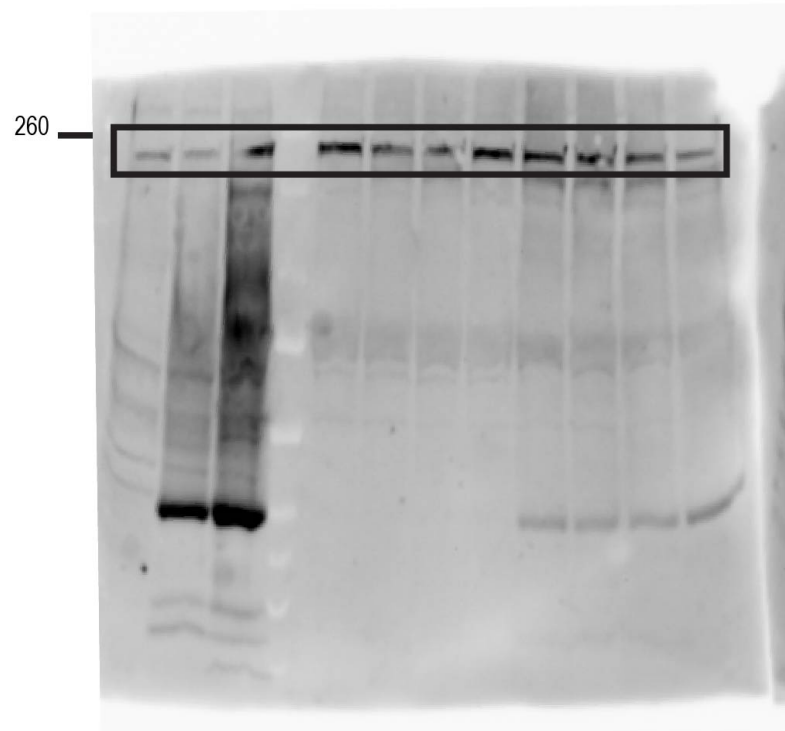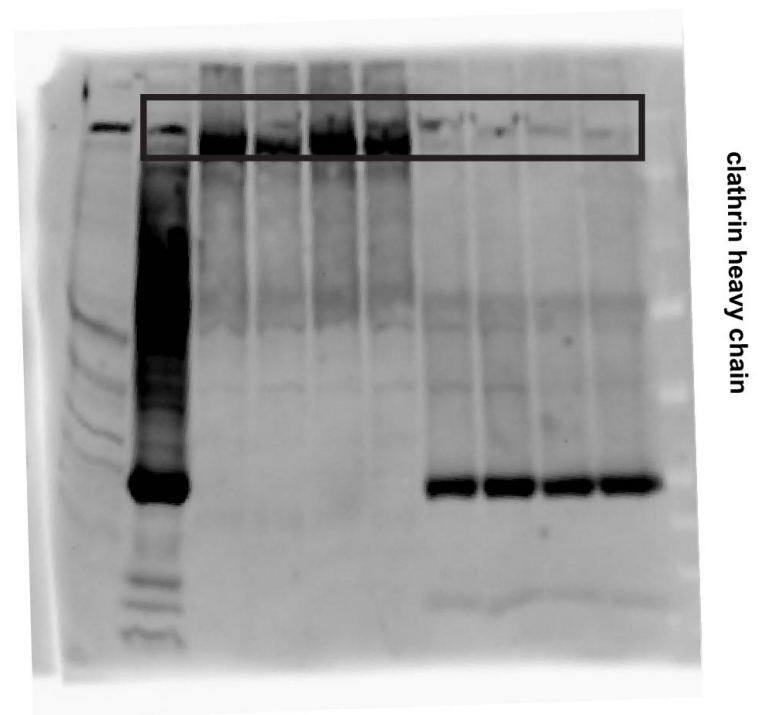

# Supplementary Figure 9 : Lysosomal degradation is not involved in NTSR1-low form degradation

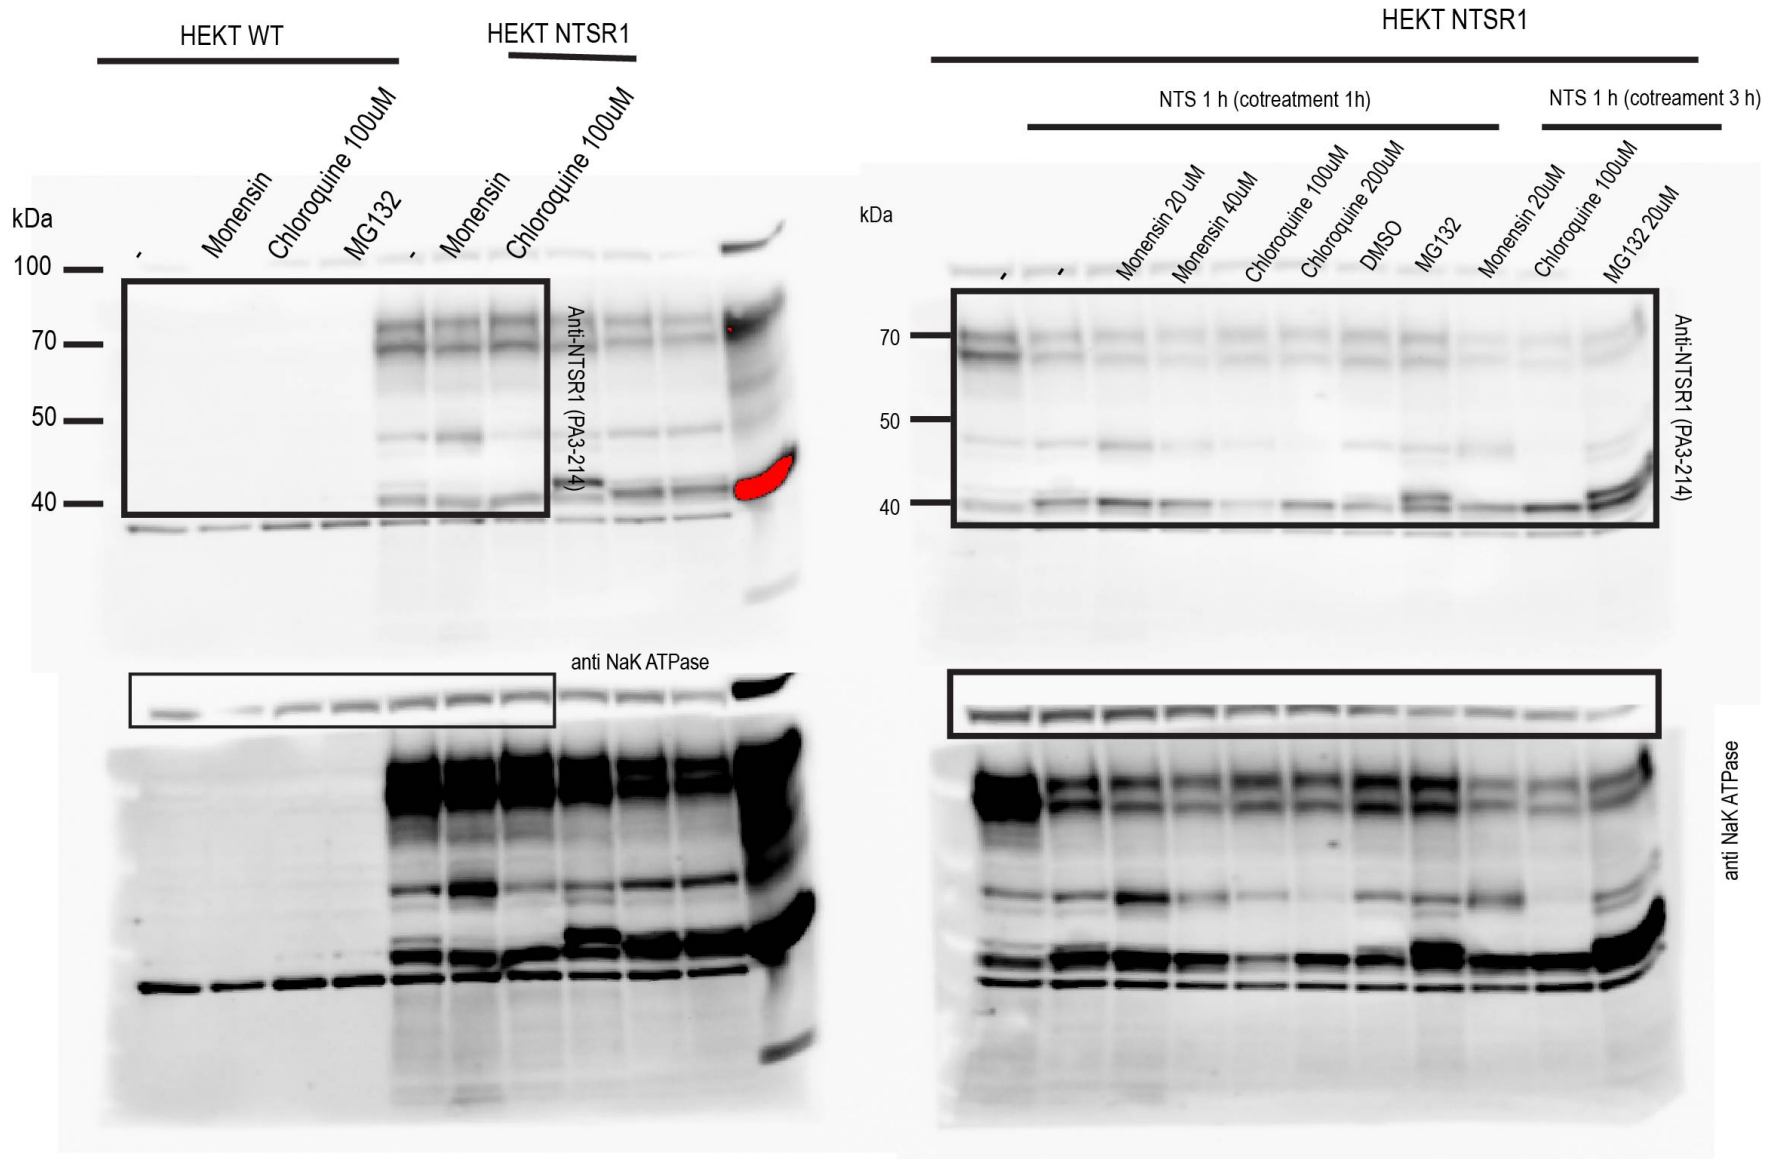

Supplement: 41598_2023_31790_MOESM2_ESM.pdf [file 41598_2023_31790_MOESM2_ESM.pdf]
